# Supplementary material for: Investigating the potential of pyrazine dioxide based-compounds as organic electrodes for batteries
Source: Royal Society of Chemistry journal article supplement (doi:10.1039/d4dt01144a), 2024-01-01
Supplement: d4dt01144a1.pdf [file d4dt01144a1.pdf]

## SUPPLEMENTARY INFORMATION

| System               | (3,-3) L( <b>r</b> )<br>CP type <sup>a</sup> | R(N), a.u. <sup>b</sup> | R(O), a.u. <sup>b</sup> | R(C), a.u. <sup>b</sup> | L( <b>r</b> <sub>CP</sub> ), a.u. | ρ( <b>r</b> <sub>CP</sub> ), a.u. |
|----------------------|----------------------------------------------|-------------------------|-------------------------|-------------------------|-----------------------------------|-----------------------------------|
| PZDO init.           | <u>N</u> -C b.m.                             | 0.785                   | -                       | 1.773                   | 2.497                             | 0.540                             |
|                      | <u>N</u> -C b.m.                             | 0.785                   | -                       | 1.773                   | 2.497                             | 0.540                             |
|                      | <u>N</u> -O b.m.                             | 0.800                   | 1.624                   | -                       | 2.149                             | 0.513                             |
| PZDO cryst init.     | <u>N</u> -C b.m.                             | 0.786                   | -                       | 1.802                   | 2.427                             | 0.531                             |
|                      | <u>N</u> -C b.m.                             | 0.786                   | -                       | 1.803                   | 2.425                             | 0.531                             |
|                      | <u>N</u> -O b.m.                             | 0.800                   | 1.655                   | -                       | 2.092                             | 0.504                             |
| PZDO DR              | <u>N</u> -C b.m.                             | 0.805                   | -                       | 1.873                   | 1.961                             | 0.482                             |
|                      | <u>N</u> -C b.m.                             | 0.805                   | -                       | 1.873                   | 1.961                             | 0.482                             |
|                      | <u>N</u> -O b.m.                             | 0.836                   | 1.874                   | -                       | 1.199                             | 0.399                             |
|                      | LP                                           | 0.743                   | 2.966                   | 3.000, 3.000            | 2.738                             | 0.573                             |
| PZDO cryst. DR       | <u>N</u> -C b.m.                             | 0.805                   | -                       | 1.864                   | 1.974                             | 0.484                             |
|                      | <u>N</u> -C b.m.                             | 0.804                   | -                       | 1.866                   | 1.973                             | 0.484                             |
|                      | <u>N</u> -O b.m.                             | 0.835                   | 1.981                   | -                       | 1.075                             | 0.383                             |
|                      | LP                                           | 0.743                   | 3.053                   | 2.990, 2.996            | 2.717                             | 0.571                             |
| TeMePzDO init.       | <u>N</u> -C b.m.                             | 0.786                   | -                       | 1.789                   | 2.428                             | 0.534                             |
|                      | <u>N</u> -C b.m.                             | 0.786                   | -                       | 1.789                   | 2.428                             | 0.534                             |
|                      | <u>N</u> -O b.m.                             | 0.804                   | 1.632                   | -                       | 2.062                             | 0.505                             |
| TeMePzDO cryst init. | <u>N</u> -C b.m.                             | 0.787                   | -                       | 1.824                   | 2.349                             | 0.525                             |
|                      | <u>N</u> -C b.m.                             | 0.787                   | -                       | 1.824                   | 2.350                             | 0.524                             |
|                      | <u>N</u> -O b.m.                             | 0.804                   | 1.651                   | -                       | 2.024                             | 0.498                             |
| TeMePzDO DR          | <u>N</u> -C b.m.                             | 0.804                   | -                       | 1.896                   | 1.949                             | 0.480                             |
|                      | <u>N</u> -C b.m.                             | 0.804                   | -                       | 1.896                   | 1.949                             | 0.480                             |
|                      | <u>N</u> -O b.m.                             | 0.838                   | 1.881                   | -                       | 1.151                             | 0.394                             |
|                      | LP                                           | 0.742                   | 2.974                   | 3.018, 3.018            | 2.771                             | 0.576                             |
| TeMePzDO cryst DR    | <u>N</u> -C b.m.                             | 0.804                   | -                       | 1.880                   | 1.965                             | 0.482                             |
|                      | <u>N</u> -C b.m.                             | 0.804                   | -                       | 1.881                   | 1.957                             | 0.482                             |
|                      | <u>N</u> -O b.m.                             | 0.836                   | 1.976                   | -                       | 1.073                             | 0.383                             |
|                      | LP                                           | 0.744                   | 3.039                   | 2.991, 3.001            | 2.721                             | 0.571                             |

Table S11: Bonded (“b.m.”) and lone pair (“LP”) (3,-3) critical point (CP) maxima of the  $L(\mathbf{r}) = -\nabla^2(\mathbf{r})$  distribution in the valence-shell charge concentration (VSCC) of the N atom for both the systems generated in the case of molecular SMD treatment (*i.e.* calculated thanks to the Gaussian package) and the molecular complexes which are present in intercalated crystalline PZDO/TeMePzDO most stable relaxed phases (*i.e.* obtained through VASP calculations).

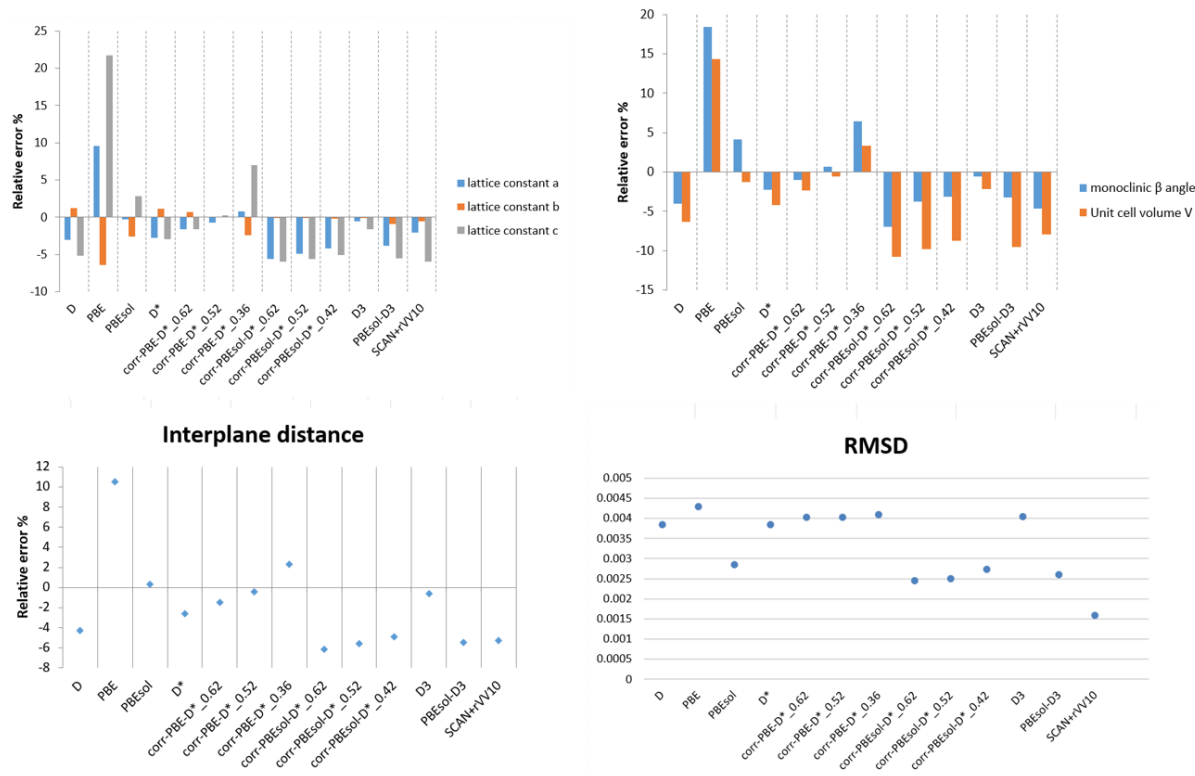

Figure S11: Relative errors (%) of DFT calculated values to experiment for the PZDO crystal: (a) for the optimized lattice parameters:  $a$ ,  $b$  and  $c$ , and (b) for the unit-cell volume  $V$  and the monoclinic angle  $\beta$ ; (c) Relative errors (%) of DFT calculated values to experiment for the inter-plane distance,  $d$ . (d) RMSD values with respect to experimental data for the intramolecular bond lengths and intermolecular distances without taking into account covalent bonds involving either H atoms or H-bonding interactions.

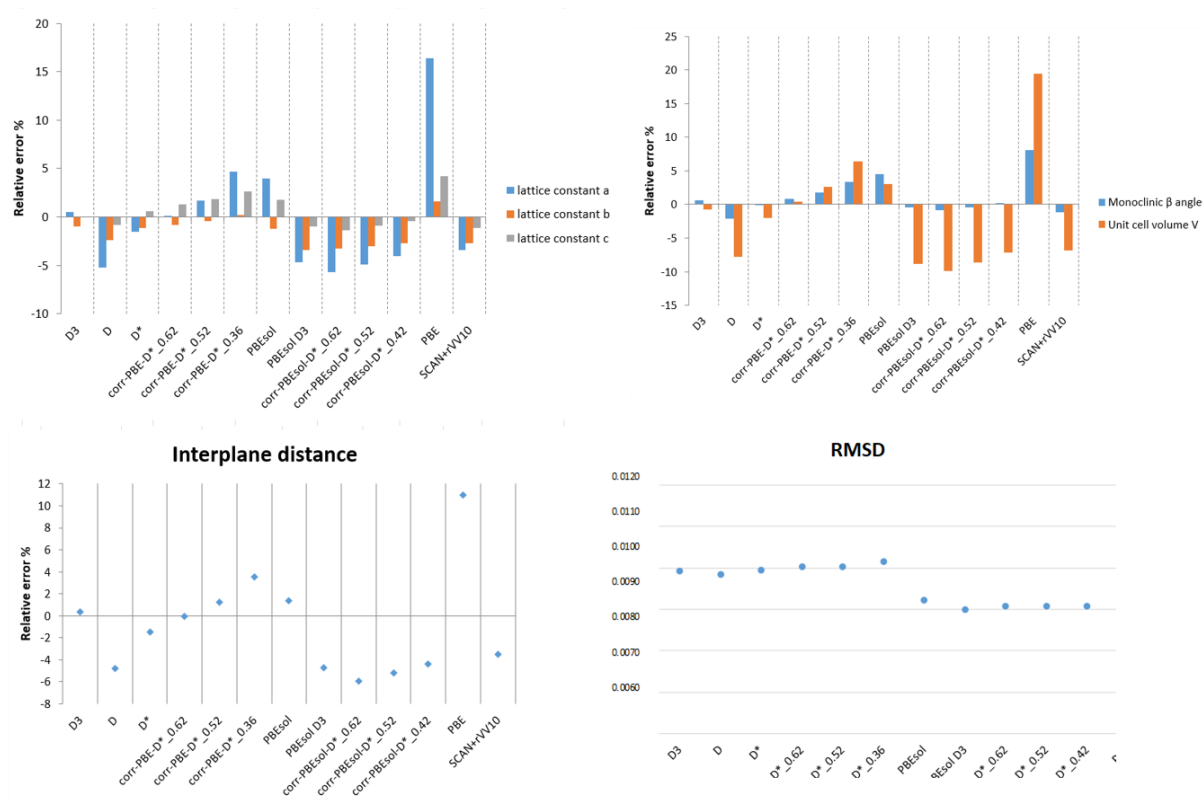

Figure SI2: Relative errors (%) of DFT calculated values to experiment for the TeMePzDO crystal: (a) for the optimized lattice parameters:  $a$ ,  $b$  and  $c$ , and (b) for the unit-cell volume  $V$  and the monoclinic angle  $\beta$ ; c) Relative errors (%) of DFT calculated values to experiment for the inter-plane distance,  $d$ . d) RMSD values with respect to experimental data for the intramolecular bond lengths and intermolecular distances without taking into account covalent bonds involving either H atoms or H-bonding interactions.

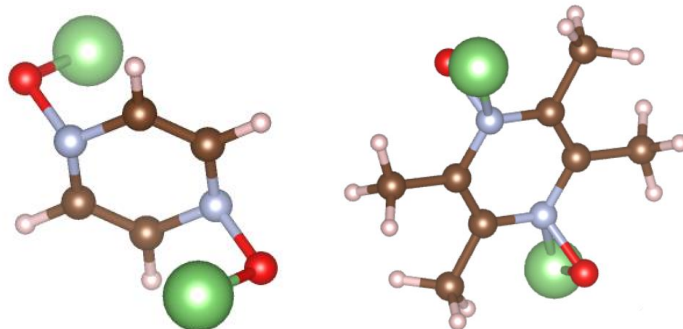

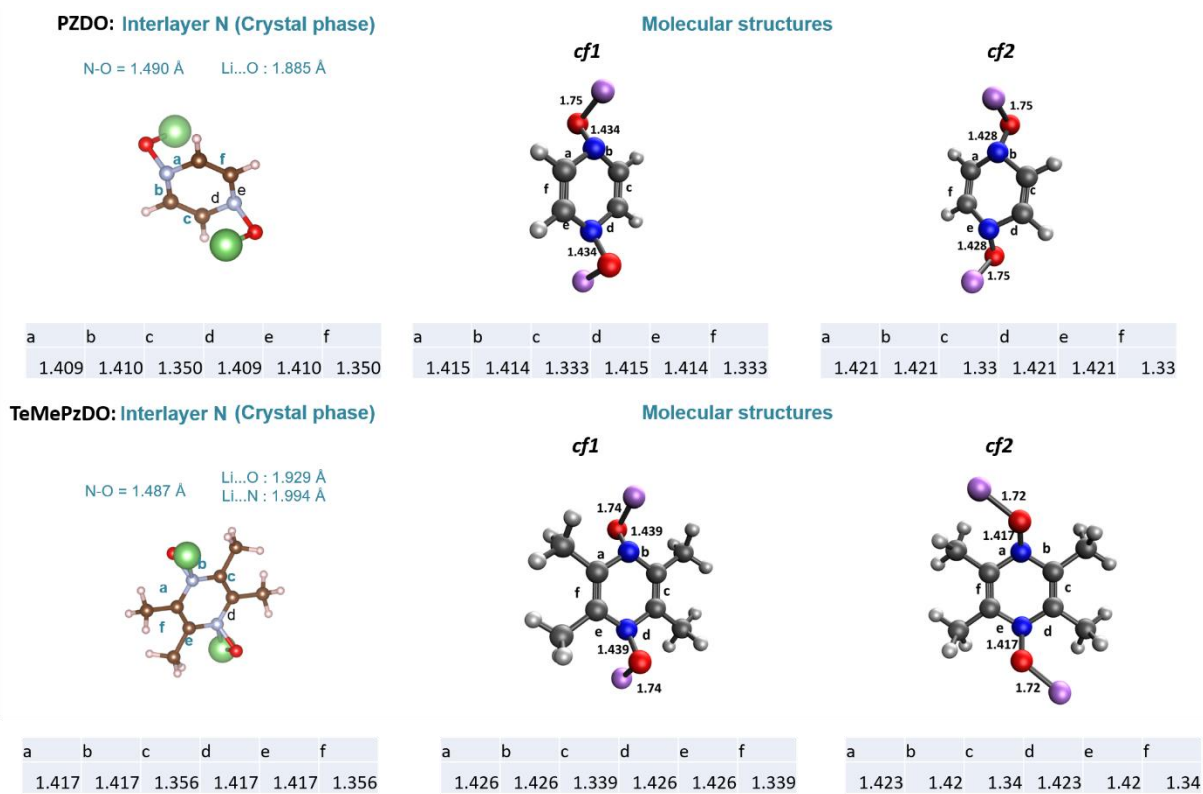

Figure SI3: Top: relaxed molecular structure extracted from the most stable intercalated PZDO and TeMePzDO crystalline phases; middle and bottom: comparison of their bond length (left) with those of molecular complexes (middle and right corresponding to two distinct conformations, *cf1* and *cf2*).

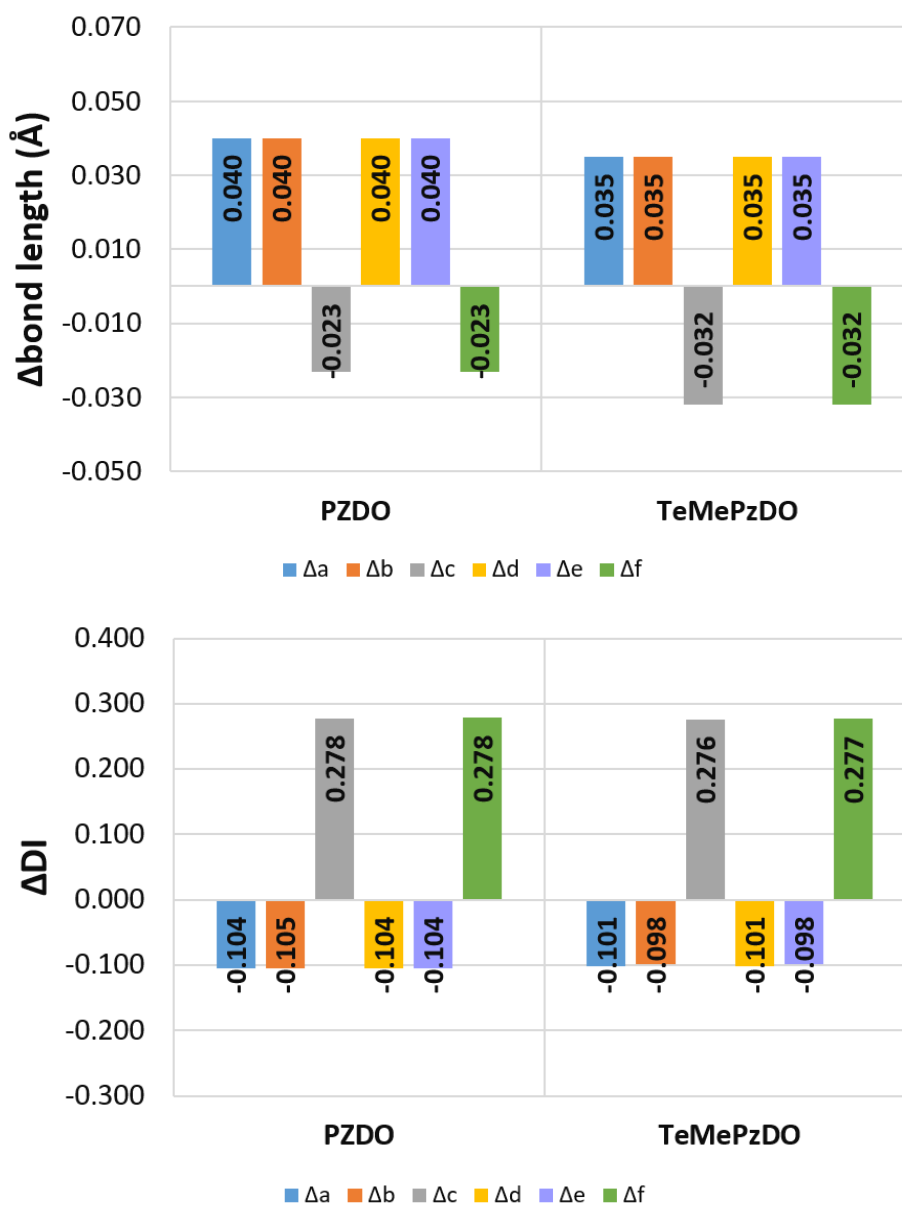

Figure SI4: Top: Calculated bond length variations ( $\Delta$ bond length) of each bond in the ring for the single (left) and double (right) reduction process characterizing molecular species in the intercalated crystalline structures; bottom: calculated DI variations ( $\Delta$ DI) of each bond in the ring for the single (left) and double (right) reduction process in the intercalated crystalline structures.

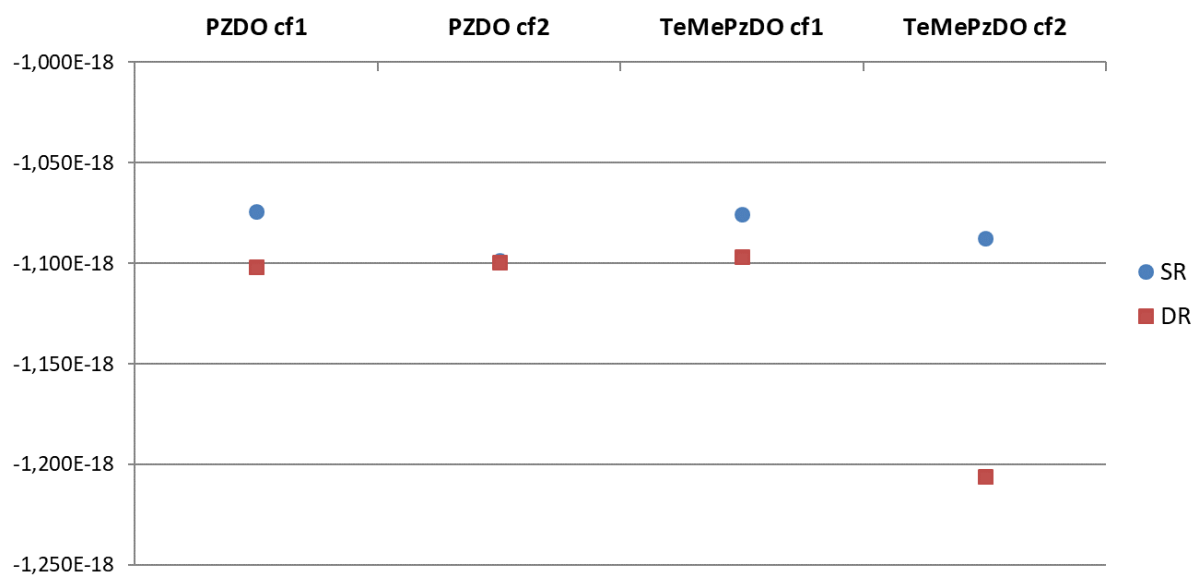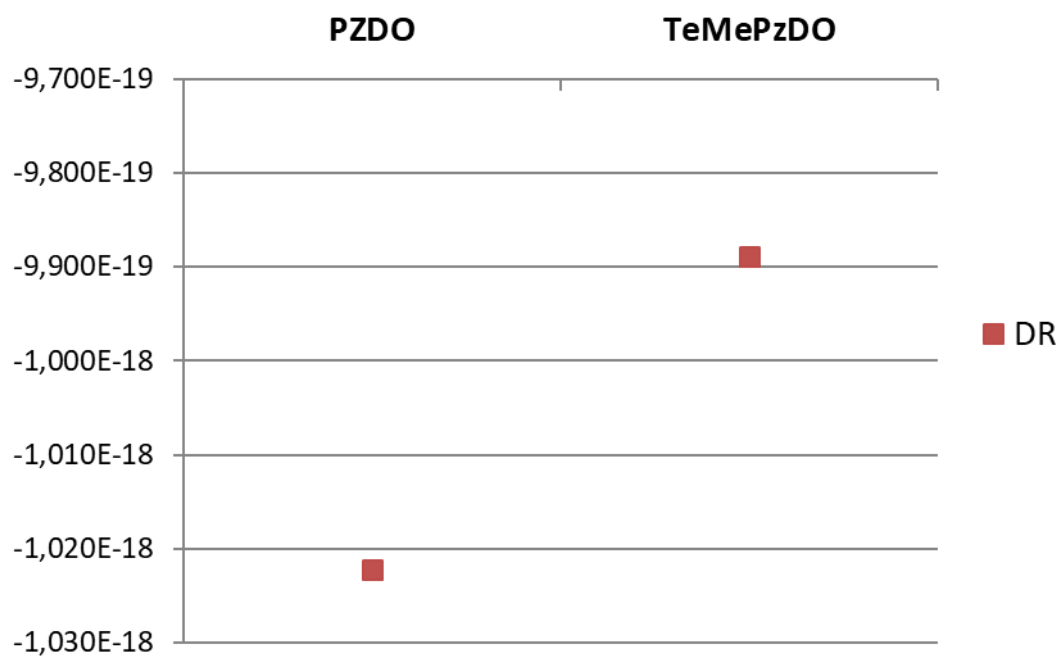

Figure SI5: (a) Estimation of the electrostatic interactions energy (in Joule), between the  $\text{Li}^+$  cations and the oxygen atoms: top: in the case of molecular species; bottom: for the same complexes, which are present in the intercalated crystal phases.

**Part 2. Calculated Structures of PZDO and TeMePzDO (molecular) and under Single and Double reduced forms with Li calculated at the M062X/6-311+G(2d,2p) with implicit SMD solvent (acetonitrile) model**

The structural parameters (bond lengths, bond/dihedral angles) – all defined with respect to the initial molecular Z-matrix of each compound (*i.e.* either PZDO or TeMePzDO) – are displayed in the following Tables for the three kinds of states (initial, singly reduced, doubly reduced) considered in this investigation.

**2-1) PZDO ( $D_{2h}$ -symmetry) Z-Matrix along with corresponding structural parameters**

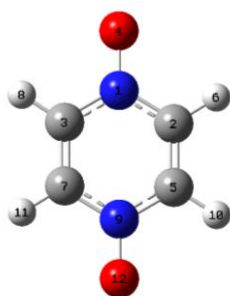

|   |   |     |   |     |   |    |
|---|---|-----|---|-----|---|----|
| N |   |     |   |     |   |    |
| C | 1 | B1  |   |     |   |    |
| C | 1 | B2  | 2 | A1  |   |    |
| O | 1 | B3  | 2 | A2  | 3 | D1 |
| C | 2 | B4  | 1 | A3  | 4 | D2 |
| H | 2 | B5  | 1 | A4  | 4 | D3 |
| C | 3 | B6  | 1 | A5  | 4 | D4 |
| H | 3 | B7  | 1 | A6  | 4 | D5 |
| N | 7 | B8  | 3 | A7  | 1 | D6 |
| H | 5 | B9  | 2 | A8  | 1 | D7 |
| H | 7 | B10 | 3 | A9  | 1 | D8 |
| O | 9 | B11 | 7 | A10 | 3 | D9 |

| Bond lengths<br>(Å) |        | Bond angles<br>(degree) |        | Dihedral<br>angles (degree) |      |
|---------------------|--------|-------------------------|--------|-----------------------------|------|
| <b>B1</b>           | 1.3534 |                         |        |                             |      |
| <b>B2</b>           | 1.3534 | <b>A1</b>               | 117.66 |                             |      |
| <b>B3</b>           | 1.2825 | <b>A2</b>               | 121.17 | <b>D1</b>                   | 180. |
| <b>B4</b>           | 1.3677 | <b>A3</b>               | 121.17 | <b>D2</b>                   | 180. |
| <b>B5</b>           | 1.0775 | <b>A4</b>               | 116.21 | <b>D3</b>                   | 0.   |
| <b>B6</b>           | 1.3677 | <b>A5</b>               | 121.17 | <b>D4</b>                   | 180. |
| <b>B7</b>           | 1.0775 | <b>A6</b>               | 116.21 | <b>D5</b>                   | 0.   |
| <b>B8</b>           | 1.3534 | <b>A7</b>               | 121.17 | <b>D6</b>                   | 0.   |
| <b>B9</b>           | 1.0775 | <b>A8</b>               | 122.62 | <b>D7</b>                   | 180. |
| <b>B10</b>          | 1.0775 | <b>A9</b>               | 122.62 | <b>D8</b>                   | 180. |
| <b>B11</b>          | 1.2825 | <b>A10</b>              | 121.17 | <b>D9</b>                   | 180. |

**Table SI-2:** Calculated structural parameters for the molecular (unreduced) PZDO system.

2-2) Singly Reduced (SR) Li-(*cf1*)-PZDO and Li-(*cf2*)-PZDO Z-Matrices along with corresponding structural parameters

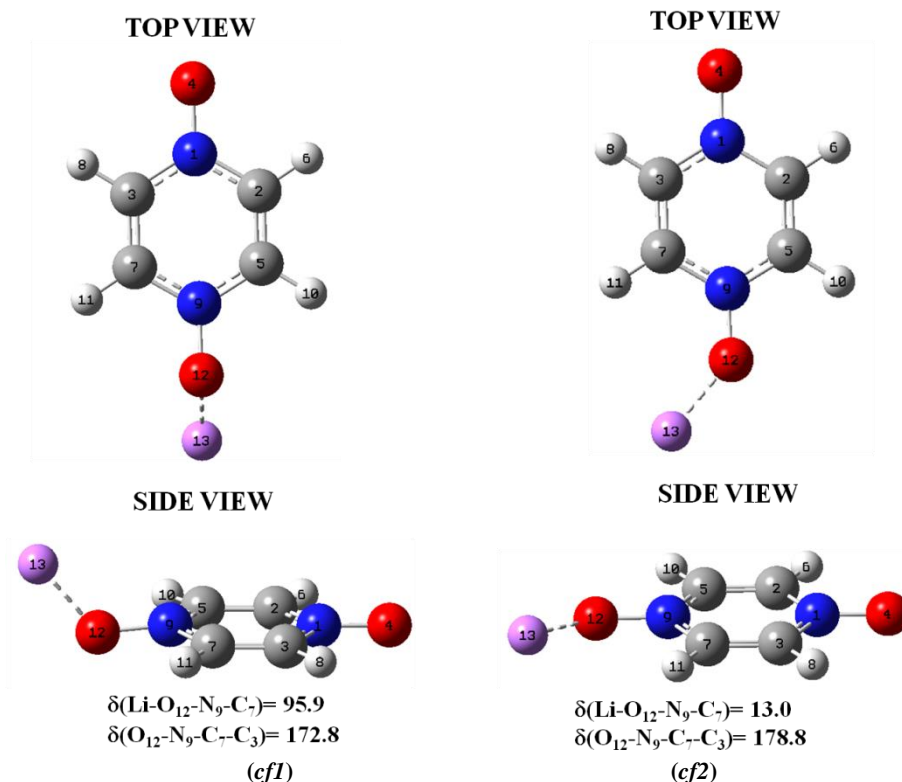

|    |    |     |   |     |   |     |
|----|----|-----|---|-----|---|-----|
| N  |    |     |   |     |   |     |
| C  | 1  | B1  |   |     |   |     |
| C  | 1  | B2  | 2 | A1  |   |     |
| O  | 1  | B3  | 2 | A2  | 3 | D1  |
| C  | 2  | B4  | 1 | A3  | 4 | D2  |
| H  | 2  | B5  | 1 | A4  | 4 | D3  |
| C  | 3  | B6  | 1 | A5  | 4 | D4  |
| H  | 3  | B7  | 1 | A6  | 4 | D5  |
| N  | 7  | B8  | 3 | A7  | 1 | D6  |
| H  | 5  | B9  | 2 | A8  | 1 | D7  |
| H  | 7  | B10 | 3 | A9  | 1 | D8  |
| O  | 9  | B11 | 7 | A10 | 3 | D9  |
| Li | 12 | B12 | 9 | A11 | 7 | D10 |

| Li-( <i>cf1</i> )-PZDO |                      |                          |        | Li-( <i>cf2</i> )-PZDO |                      |                          |        |
|------------------------|----------------------|--------------------------|--------|------------------------|----------------------|--------------------------|--------|
| Bond-lengths (Å)       | Bond angles (degree) | Dihedral angles (degree) |        | Bond lengths (Å)       | Bond angles (degree) | Dihedral angles (degree) |        |
| <b>B1</b>              | 1.3814               |                          |        | <b>B1</b>              | 1.3820               |                          |        |
| <b>B2</b>              | 1.3814               | <b>A1</b>                | 117.26 | <b>B2</b>              | 1.3801               | <b>A1</b>                | 117.27 |
| <b>B3</b>              | 1.3160               | <b>A2</b>                | 121.36 | <b>B3</b>              | 1.3169               | <b>A2</b>                | 121.34 |
| <b>B4</b>              | 1.3521               | <b>A3</b>                | 121.27 | <b>B4</b>              | 1.3520               | <b>A3</b>                | 121.30 |
| <b>B5</b>              | 1.0774               | <b>A4</b>                | 116.04 | <b>B5</b>              | 1.0773               | <b>A4</b>                | 116.06 |
| <b>B6</b>              | 1.3521               | <b>A5</b>                | 121.27 | <b>B6</b>              | 1.3524               | <b>A5</b>                | 121.33 |
| <b>B7</b>              | 1.0774               | <b>A6</b>                | 116.04 | <b>B7</b>              | 1.0774               | <b>A6</b>                | 116.08 |
| <b>B8</b>              | 1.3732               | <b>A7</b>                | 120.95 | <b>B8</b>              | 1.3733               | <b>A7</b>                | 120.89 |
| <b>B9</b>              | 1.0778               | <b>A8</b>                | 122.63 | <b>B9</b>              | 1.0777               | <b>A8</b>                | 122.72 |
| <b>B10</b>             | 1.0778               | <b>A9</b>                | 122.63 | <b>B10</b>             | 1.0782               | <b>A9</b>                | 122.34 |
| <b>B11</b>             | 1.3522               | <b>A10</b>               | 120.44 | <b>B11</b>             | 1.3428               | <b>A10</b>               | 121.70 |
| <b>B12</b>             | 1.7505               | <b>A11</b>               | 124.77 | <b>B12</b>             | 1.7284               | <b>A11</b>               | 137.39 |
|                        |                      | <b>D1</b>                | 178.0  | <b>D1</b>              |                      | <b>D1</b>                | 179.6  |
|                        |                      | <b>D2</b>                | -179.3 | <b>D2</b>              |                      | <b>D2</b>                | -179.8 |
|                        |                      | <b>D3</b>                | 0.5    | <b>D3</b>              |                      | <b>D3</b>                | 0.1    |
|                        |                      | <b>D4</b>                | 179.3  | <b>D4</b>              |                      | <b>D4</b>                | 179.8  |
|                        |                      | <b>D5</b>                | -0.5   | <b>D5</b>              |                      | <b>D5</b>                | -0.1   |
|                        |                      | <b>D6</b>                | -0.8   | <b>D6</b>              |                      | <b>D6</b>                | -0.1   |
|                        |                      | <b>D7</b>                | -179.8 | <b>D7</b>              |                      | <b>D7</b>                | -180.0 |
|                        |                      | <b>D8</b>                | 179.8  | <b>D8</b>              |                      | <b>D8</b>                | 179.9  |
|                        |                      | <b>D9</b>                | 172.8  | <b>D9</b>              |                      | <b>D9</b>                | 178.8  |
|                        |                      | <b>D10</b>               | 95.9   | <b>D10</b>             |                      | <b>D10</b>               | 13.0   |

Table SI-3: Calculated structural parameters for Singly Reduced (SR) Li-PZDO systems.



2-3) 2Li-(*cf1*)-PZDO and 2Li-(*cf2*)-PZDO Z-Matrices along with corresponding structural parameters

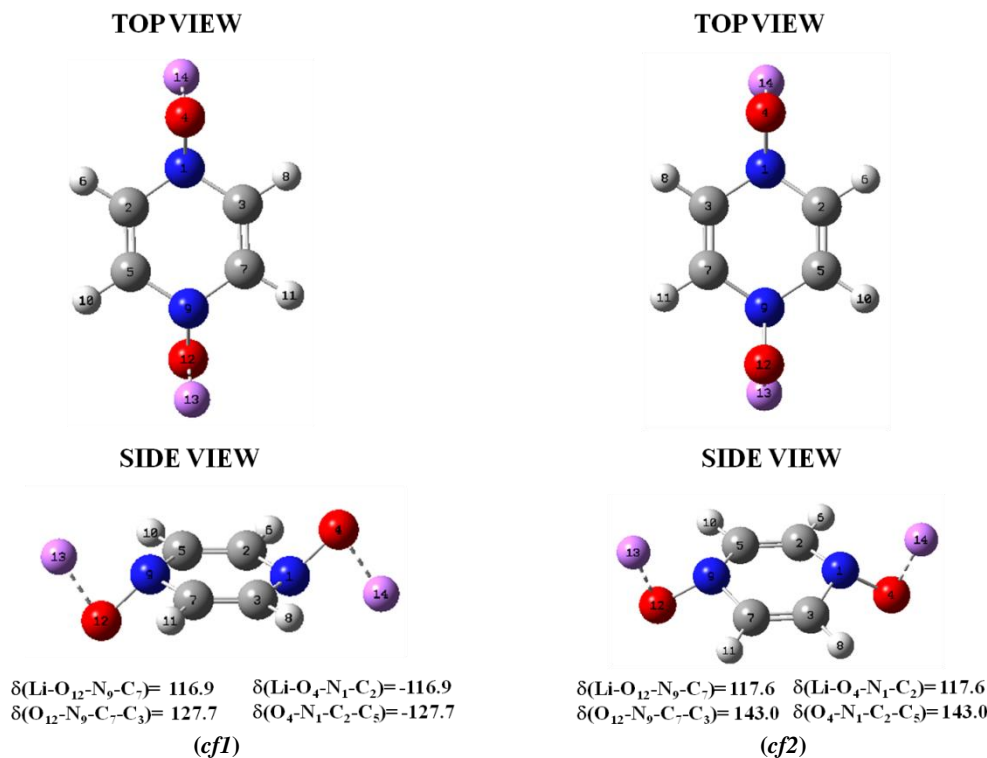

|    |    |     |   |     |   |     |
|----|----|-----|---|-----|---|-----|
| N  |    |     |   |     |   |     |
| C  | 1  | B1  |   |     |   |     |
| C  | 1  | B2  | 2 | A1  |   |     |
| O  | 1  | B3  | 2 | A2  | 3 | D1  |
| C  | 2  | B4  | 1 | A3  | 4 | D2  |
| H  | 2  | B5  | 1 | A4  | 4 | D3  |
| C  | 3  | B6  | 1 | A5  | 4 | D4  |
| H  | 3  | B7  | 1 | A6  | 4 | D5  |
| N  | 7  | B8  | 3 | A7  | 1 | D6  |
| H  | 5  | B9  | 2 | A8  | 1 | D7  |
| H  | 7  | B10 | 3 | A9  | 1 | D8  |
| O  | 9  | B11 | 7 | A10 | 3 | D9  |
| Li | 12 | B12 | 9 | A11 | 5 | D10 |
| Li | 4  | B13 | 1 | A12 | 2 | D11 |

| 2Li-( <i>cf1</i> )-PZDO |                      |            |                          | 2Li-( <i>cf2</i> )-PZDO |                      |            |                          |
|-------------------------|----------------------|------------|--------------------------|-------------------------|----------------------|------------|--------------------------|
| Bond-lengths (Å)        | Bond angles (degree) |            | Dihedral angles (degree) | Bond lengths (Å)        | Bond angles (degree) |            | Dihedral angles (degree) |
| <b>B1</b>               | 1.4145               |            |                          | <b>B1</b>               | 1.4208               |            |                          |
| <b>B2</b>               | 1.4145               | <b>A1</b>  | 112.44                   | <b>B2</b>               | 1.4208               | <b>A1</b>  | 111.27                   |
| <b>B3</b>               | 1.4337               | <b>A2</b>  | 111.26                   | <b>B3</b>               | 1.4282               | <b>A2</b>  | 111.33                   |
| <b>B4</b>               | 1.3333               | <b>A3</b>  | 123.76                   | <b>B4</b>               | 1.3301               | <b>A3</b>  | 123.03                   |
| <b>B5</b>               | 1.0803               | <b>A4</b>  | 114.89                   | <b>B5</b>               | 1.0790               | <b>A4</b>  | 114.76                   |
| <b>B6</b>               | 1.3333               | <b>A5</b>  | 123.76                   | <b>B6</b>               | 1.3301               | <b>A5</b>  | 123.01                   |
| <b>B7</b>               | 1.0803               | <b>A6</b>  | 114.90                   | <b>B7</b>               | 1.0790               | <b>A6</b>  | 114.77                   |
| <b>B8</b>               | 1.4145               | <b>A7</b>  | 123.76                   | <b>B8</b>               | 1.4208               | <b>A7</b>  | 123.03                   |
| <b>B9</b>               | 1.0803               | <b>A8</b>  | 121.34                   | <b>B9</b>               | 1.0790               | <b>A8</b>  | 122.16                   |
| <b>B10</b>              | 1.0803               | <b>A9</b>  | 121.35                   | <b>B10</b>              | 1.0790               | <b>A9</b>  | 122.16                   |
| <b>B11</b>              | 1.4337               | <b>A10</b> | 111.26                   | <b>B11</b>              | 1.4282               | <b>A10</b> | 111.33                   |
| <b>B12</b>              | 1.7497               | <b>A11</b> | 75.19                    | <b>B12</b>              | 1.7493               | <b>A11</b> | 75.41                    |
| <b>B13</b>              | 1.7497               | <b>A12</b> | 75.19                    | <b>B13</b>              | 1.7493               | <b>A12</b> | 75.41                    |
|                         |                      |            |                          |                         |                      | <b>D1</b>  | 124.8                    |
|                         |                      |            | <b>D1</b>                | -125.5                  |                      | <b>D2</b>  | 143.0                    |
|                         |                      |            | <b>D2</b>                | -127.7                  |                      | <b>D3</b>  | -39.7                    |
|                         |                      |            | <b>D3</b>                | 51.8                    |                      | <b>D4</b>  | -143.0                   |
|                         |                      |            | <b>D4</b>                | 127.7                   |                      | <b>D5</b>  | 39.7                     |
|                         |                      |            | <b>D5</b>                | -51.8                   |                      | <b>D6</b>  | 0.0                      |
|                         |                      |            | <b>D6</b>                | -2.4                    |                      | <b>D7</b>  | 177.2                    |
|                         |                      |            | <b>D7</b>                | -177.0                  |                      | <b>D8</b>  | -177.2                   |
|                         |                      |            | <b>D8</b>                | 177.1                   |                      | <b>D9</b>  | 143.0                    |
|                         |                      |            | <b>D9</b>                | 127.7                   |                      | <b>D10</b> | 117.6                    |
|                         |                      |            | <b>D10</b>               | 116.9                   |                      | <b>D11</b> | 117.6                    |
|                         |                      |            | <b>D11</b>               | -116.9                  |                      |            |                          |

Table SI-4: Calculated structural parameters for the Doubly Reduced (DR) 2Li-PZDO systems.

## 2-4) TeMePzDO Z-Matrix along with corresponding structural parameters

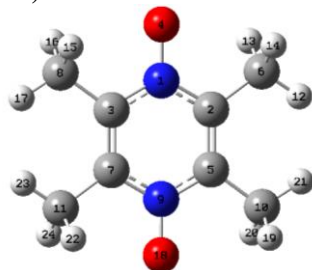

|   |    |     |   |     |   |     |
|---|----|-----|---|-----|---|-----|
| N |    |     |   |     |   |     |
| C | 1  | B1  |   |     |   |     |
| C | 1  | B2  | 2 | A1  |   |     |
| O | 1  | B3  | 2 | A2  | 3 | D1  |
| C | 2  | B4  | 1 | A3  | 4 | D2  |
| C | 2  | B5  | 1 | A4  | 4 | D3  |
| C | 3  | B6  | 1 | A5  | 4 | D4  |
| C | 3  | B7  | 1 | A6  | 4 | D5  |
| N | 7  | B8  | 3 | A7  | 1 | D6  |
| C | 5  | B9  | 2 | A8  | 1 | D7  |
| C | 7  | B10 | 3 | A9  | 1 | D8  |
| H | 6  | B11 | 2 | A10 | 1 | D9  |
| H | 6  | B12 | 2 | A11 | 1 | D10 |
| H | 6  | B13 | 2 | A12 | 1 | D11 |
| H | 8  | B14 | 3 | A13 | 1 | D12 |
| H | 8  | B15 | 3 | A14 | 1 | D13 |
| H | 8  | B16 | 3 | A15 | 1 | D14 |
| O | 9  | B17 | 7 | A16 | 3 | D15 |
| H | 10 | B18 | 5 | A17 | 2 | D16 |
| H | 10 | B19 | 5 | A18 | 2 | D17 |
| H | 10 | B20 | 5 | A19 | 2 | D18 |
| H | 11 | B21 | 7 | A20 | 3 | D19 |
| H | 11 | B22 | 7 | A21 | 3 | D20 |
| H | 11 | B23 | 7 | A22 | 3 | D21 |

| Bond lengths (Å) |        | Bond angles (degree) |        | Dihedral angles (degree) |        |
|------------------|--------|----------------------|--------|--------------------------|--------|
| <b>B1</b>        | 1.3625 |                      |        |                          |        |
| <b>B2</b>        | 1.3625 | <b>A1</b>            | 121.11 |                          |        |
| <b>B3</b>        | 1.2887 | <b>A2</b>            | 119.45 | <b>D1</b>                | -179.9 |
| <b>B4</b>        | 1.3821 | <b>A3</b>            | 119.42 | <b>D2</b>                | 179.4  |
| <b>B5</b>        | 1.4886 | <b>A4</b>            | 115.02 | <b>D3</b>                | -0.8   |
| <b>B6</b>        | 1.3821 | <b>A5</b>            | 119.46 | <b>D4</b>                | -179.4 |
| <b>B7</b>        | 1.4883 | <b>A6</b>            | 115.01 | <b>D5</b>                | 0.7    |
| <b>B8</b>        | 1.3625 | <b>A7</b>            | 119.42 | <b>D6</b>                | -0.7   |
| <b>B9</b>        | 1.4883 | <b>A8</b>            | 125.53 | <b>D7</b>                | -179.2 |
| <b>B10</b>       | 1.4886 | <b>A9</b>            | 125.56 | <b>D8</b>                | 179.1  |
| <b>B11</b>       | 1.0825 | <b>A10</b>           | 111.96 | <b>D9</b>                | -176.9 |
| <b>B12</b>       | 1.0899 | <b>A11</b>           | 109.30 | <b>D10</b>               | -55.5  |
| <b>B13</b>       | 1.0904 | <b>A12</b>           | 109.73 | <b>D11</b>               | 61.3   |
| <b>B14</b>       | 1.0905 | <b>A13</b>           | 109.73 | <b>D12</b>               | -61.9  |
| <b>B15</b>       | 1.0898 | <b>A14</b>           | 109.32 | <b>D13</b>               | 54.9   |
| <b>B16</b>       | 1.0824 | <b>A15</b>           | 111.92 | <b>D14</b>               | 176.3  |
| <b>B17</b>       | 1.2887 | <b>A16</b>           | 119.45 | <b>D15</b>               | -179.4 |
| <b>B18</b>       | 1.0898 | <b>A17</b>           | 109.32 | <b>D16</b>               | 124.9  |
| <b>B19</b>       | 1.0905 | <b>A18</b>           | 109.73 | <b>D17</b>               | -118.2 |
| <b>B20</b>       | 1.0824 | <b>A19</b>           | 111.92 | <b>D18</b>               | 3.5    |
| <b>B21</b>       | 1.0899 | <b>A20</b>           | 109.30 | <b>D19</b>               | -124.3 |
| <b>B22</b>       | 1.0825 | <b>A21</b>           | 111.96 | <b>D20</b>               | -2.9   |
| <b>B23</b>       | 1.0904 | <b>A22</b>           | 109.73 | <b>D21</b>               | 118.9  |

**Table SI-5:** Calculated structural parameters for the molecular (unreduced) TeMePzDO system.

2-5) Li-(*cf1*)- and Li-(*cf2*)-TeMePzDO Z-Matrices along with corresponding structural parameters

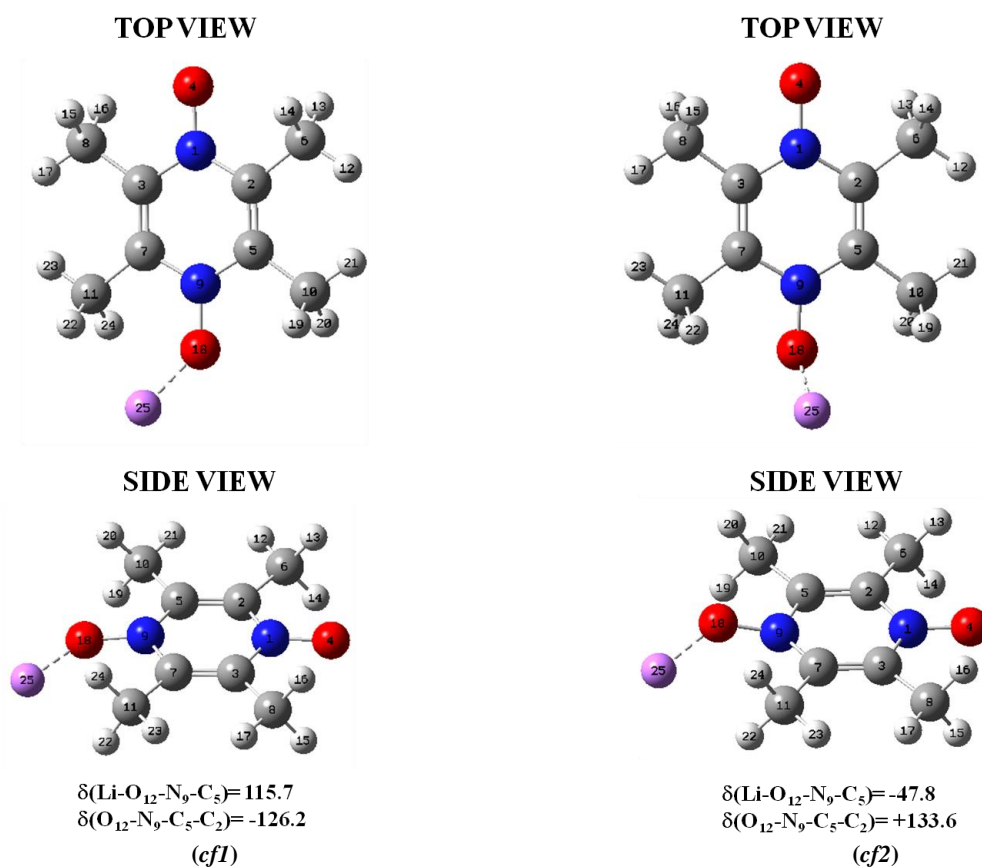

|    |    |     |   |     |   |     |
|----|----|-----|---|-----|---|-----|
| N  |    |     |   |     |   |     |
| C  | 1  | B1  |   |     |   |     |
| C  | 1  | B2  | 2 | A1  |   |     |
| O  | 1  | B3  | 2 | A2  | 3 | D1  |
| C  | 2  | B4  | 1 | A3  | 4 | D2  |
| C  | 2  | B5  | 1 | A4  | 4 | D3  |
| C  | 3  | B6  | 1 | A5  | 4 | D4  |
| C  | 3  | B7  | 1 | A6  | 4 | D5  |
| N  | 7  | B8  | 3 | A7  | 1 | D6  |
| C  | 5  | B9  | 2 | A8  | 1 | D7  |
| C  | 7  | B10 | 3 | A9  | 1 | D8  |
| H  | 6  | B11 | 2 | A10 | 1 | D9  |
| H  | 6  | B12 | 2 | A11 | 1 | D10 |
| H  | 6  | B13 | 2 | A12 | 1 | D11 |
| H  | 8  | B14 | 3 | A13 | 1 | D12 |
| H  | 8  | B15 | 3 | A14 | 1 | D13 |
| H  | 8  | B16 | 3 | A15 | 1 | D14 |
| O  | 9  | B17 | 7 | A16 | 3 | D15 |
| H  | 10 | B18 | 5 | A17 | 2 | D16 |
| H  | 10 | B19 | 5 | A18 | 2 | D17 |
| H  | 10 | B20 | 5 | A19 | 2 | D18 |
| H  | 11 | B21 | 7 | A20 | 3 | D19 |
| H  | 11 | B22 | 7 | A21 | 3 | D20 |
| H  | 11 | B23 | 7 | A22 | 3 | D21 |
| Li | 18 | B24 | 9 | A23 | 5 | D22 |

| Li-( <i>cf1</i> )-TeMePzDO |        |                      |        |                          | Li-( <i>cf2</i> )-TeMePzDO |                  |        |                      |        |                          |        |
|----------------------------|--------|----------------------|--------|--------------------------|----------------------------|------------------|--------|----------------------|--------|--------------------------|--------|
| Bond-lengths (Å)           |        | Bond angles (degree) |        | Dihedral angles (degree) |                            | Bond lengths (Å) |        | Bond angles (degree) |        | Dihedral angles (degree) |        |
| <b>B1</b>                  | 1.3937 |                      |        |                          |                            | <b>B1</b>        | 1.3916 |                      |        |                          |        |
| <b>B2</b>                  | 1.3900 | <b>A1</b>            | 120.34 |                          |                            | <b>B2</b>        | 1.3916 | <b>A1</b>            | 120.30 |                          |        |
| <b>B3</b>                  | 1.3218 | <b>A2</b>            | 119.79 | <b>D1</b>                | 178.7                      | <b>B3</b>        | 1.3196 | <b>A2</b>            | 119.81 | <b>D1</b>                | -176.9 |
| <b>B4</b>                  | 1.3616 | <b>A3</b>            | 119.86 | <b>D2</b>                | 178.6                      | <b>B4</b>        | 1.3618 | <b>A3</b>            | 119.80 | <b>D2</b>                | -179.2 |
| <b>B5</b>                  | 1.4930 | <b>A4</b>            | 114.38 | <b>D3</b>                | -1.7                       | <b>B5</b>        | 1.4935 | <b>A4</b>            | 114.33 | <b>D3</b>                | 1.7    |
| <b>B6</b>                  | 1.3623 | <b>A5</b>            | 119.75 | <b>D4</b>                | -178.7                     | <b>B6</b>        | 1.3618 | <b>A5</b>            | 119.80 | <b>D4</b>                | 179.2  |
| <b>B7</b>                  | 1.4932 | <b>A6</b>            | 114.39 | <b>D5</b>                | 1.7                        | <b>B7</b>        | 1.4935 | <b>A6</b>            | 114.33 | <b>D5</b>                | -1.7   |
| <b>B8</b>                  | 1.3872 | <b>A7</b>            | 119.58 | <b>D6</b>                | -0.5                       | <b>B8</b>        | 1.3890 | <b>A7</b>            | 119.63 | <b>D6</b>                | 1.5    |
| <b>B9</b>                  | 1.4947 | <b>A8</b>            | 125.69 | <b>D7</b>                | 179.6                      | <b>B9</b>        | 1.4949 | <b>A8</b>            | 125.50 | <b>D7</b>                | -179.3 |
| <b>B10</b>                 | 1.4955 | <b>A9</b>            | 125.20 | <b>D8</b>                | -179.3                     | <b>B10</b>       | 1.4949 | <b>A9</b>            | 125.50 | <b>D8</b>                | 179.3  |
| <b>B11</b>                 | 1.0838 | <b>A10</b>           | 111.87 | <b>D9</b>                | -179.7                     | <b>B11</b>       | 1.0837 | <b>A10</b>           | 111.98 | <b>D9</b>                | 179.6  |
| <b>B12</b>                 | 1.0906 | <b>A11</b>           | 110.17 | <b>D10</b>               | -58.2                      | <b>B12</b>       | 1.0901 | <b>A11</b>           | 110.04 | <b>D10</b>               | -59.0  |
| <b>B13</b>                 | 1.0902 | <b>A12</b>           | 110.06 | <b>D11</b>               | 59.0                       | <b>B13</b>       | 1.0906 | <b>A12</b>           | 110.11 | <b>D11</b>               | 58.1   |
| <b>B14</b>                 | 1.0902 | <b>A13</b>           | 109.93 | <b>D12</b>               | -59.0                      | <b>B14</b>       | 1.0906 | <b>A13</b>           | 110.11 | <b>D12</b>               | -58.1  |
| <b>B15</b>                 | 1.0905 | <b>A14</b>           | 110.05 | <b>D13</b>               | 58.0                       | <b>B15</b>       | 1.0901 | <b>A14</b>           | 110.04 | <b>D13</b>               | 59.0   |
| <b>B16</b>                 | 1.0839 | <b>A15</b>           | 112.13 | <b>D14</b>               | 179.7                      | <b>B16</b>       | 1.0837 | <b>A15</b>           | 111.98 | <b>D14</b>               | -179.6 |
| <b>B17</b>                 | 1.3500 | <b>A16</b>           | 119.93 | <b>D15</b>               | 171.3                      | <b>B17</b>       | 1.3633 | <b>A16</b>           | 118.20 | <b>D15</b>               | -165.4 |
| <b>B18</b>                 | 1.0900 | <b>A17</b>           | 110.46 | <b>D16</b>               | 117.7                      | <b>B18</b>       | 1.0921 | <b>A17</b>           | 110.52 | <b>D16</b>               | 123.1  |
| <b>B19</b>                 | 1.0904 | <b>A18</b>           | 109.93 | <b>D17</b>               | -124.8                     | <b>B19</b>       | 1.0894 | <b>A18</b>           | 110.08 | <b>D17</b>               | -119.1 |
| <b>B20</b>                 | 1.0837 | <b>A19</b>           | 111.75 | <b>D18</b>               | -3.7                       | <b>B20</b>       | 1.0836 | <b>A19</b>           | 111.83 | <b>D18</b>               | 2.4    |
| <b>B21</b>                 | 1.0945 | <b>A20</b>           | 111.11 | <b>D19</b>               | -114.1                     | <b>B21</b>       | 1.0921 | <b>A20</b>           | 110.08 | <b>D19</b>               | -123.1 |
| <b>B22</b>                 | 1.0832 | <b>A21</b>           | 111.85 | <b>D20</b>               | 5.2                        | <b>B22</b>       | 1.0836 | <b>A21</b>           | 111.83 | <b>D20</b>               | -2.4   |
| <b>B23</b>                 | 1.0942 | <b>A22</b>           | 110.44 | <b>D21</b>               | 124.4                      | <b>B23</b>       | 1.0894 | <b>A22</b>           | 110.52 | <b>D21</b>               | 119.1  |
| <b>B24</b>                 | 1.7258 | <b>A23</b>           | 132.67 | <b>D22</b>               | 177.3                      | <b>B24</b>       | 1.7482 | <b>A23</b>           | 119.41 | <b>D22</b>               | 99.8   |

**Table SI-6:** Calculated structural parameters for the Singly Reduced (SR) 1Li-TeMePzDO systems.

2-6) 2Li-(*cf1*)- and 2Li-(*cf2*)-TeMePzDO Z-Matrices along with corresponding structural parameters

TOP VIEW

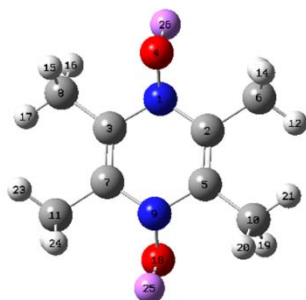

SIDE VIEW

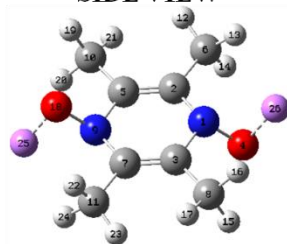

$$\begin{aligned} \delta(\text{Li-O}_{18}\text{-N}_9\text{-C}_5) &= 115.7 & \delta(\text{Li-O}_4\text{-N}_1\text{-C}_2) &= -115.7 \\ \delta(\text{O}_{18}\text{-N}_9\text{-C}_5\text{-C}_2) &= -126.2 & \delta(\text{O}_4\text{-N}_1\text{-C}_3\text{-C}_7) &= 126.2 \end{aligned}$$

(*cf1*)

TOP VIEW

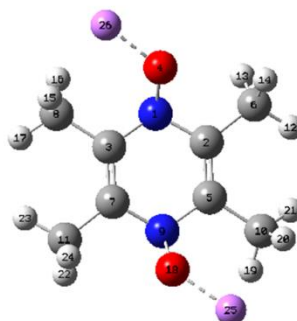

SIDE VIEW

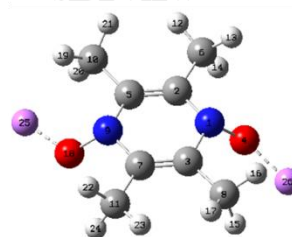

$$\begin{aligned} \delta(\text{Li-O}_{18}\text{-N}_9\text{-C}_5) &= -47.7 & \delta(\text{Li-O}_4\text{-N}_1\text{-C}_2) &= -47.8 \\ \delta(\text{O}_{18}\text{-N}_9\text{-C}_5\text{-C}_2) &= -132.2 & \delta(\text{O}_4\text{-N}_1\text{-C}_3\text{-C}_7) &= -132.1 \end{aligned}$$

(*cf2*)

|    |    |     |   |     |   |     |   |
|----|----|-----|---|-----|---|-----|---|
| N  |    |     |   |     |   |     |   |
| C  | 1  | B1  |   |     |   |     |   |
| C  | 1  | B2  | 2 | A1  |   |     |   |
| O  | 1  | B3  | 2 | A2  | 3 | D1  | 0 |
| C  | 2  | B4  | 1 | A3  | 4 | D2  | 0 |
| C  | 2  | B5  | 1 | A4  | 4 | D3  | 0 |
| C  | 3  | B6  | 1 | A5  | 4 | D4  | 0 |
| C  | 3  | B7  | 1 | A6  | 4 | D5  | 0 |
| N  | 7  | B8  | 3 | A7  | 1 | D6  | 0 |
| C  | 5  | B9  | 2 | A8  | 1 | D7  | 0 |
| C  | 7  | B10 | 3 | A9  | 1 | D8  | 0 |
| H  | 6  | B11 | 2 | A10 | 1 | D9  | 0 |
| H  | 6  | B12 | 2 | A11 | 1 | D10 | 0 |
| H  | 6  | B13 | 2 | A12 | 1 | D11 | 0 |
| H  | 8  | B14 | 3 | A13 | 1 | D12 | 0 |
| H  | 8  | B15 | 3 | A14 | 1 | D13 | 0 |
| H  | 8  | B16 | 3 | A15 | 1 | D14 | 0 |
| O  | 9  | B17 | 7 | A16 | 3 | D15 | 0 |
| H  | 10 | B18 | 5 | A17 | 2 | D16 | 0 |
| H  | 10 | B19 | 5 | A18 | 2 | D17 | 0 |
| H  | 10 | B20 | 5 | A19 | 2 | D18 | 0 |
| H  | 11 | B21 | 7 | A20 | 3 | D19 | 0 |
| H  | 11 | B22 | 7 | A21 | 3 | D20 | 0 |
| H  | 11 | B23 | 7 | A22 | 3 | D21 | 0 |
| Li | 18 | B24 | 9 | A23 | 5 | D22 | 0 |
| Li | 4  | B25 | 1 | A24 | 3 | D23 | 0 |

| 2Li-( <i>cf1</i> )-TMePzDO |        |                      |        |                          | 2Li-( <i>cf2</i> )-TMePzDO |                  |        |                      |        |                          |        |
|----------------------------|--------|----------------------|--------|--------------------------|----------------------------|------------------|--------|----------------------|--------|--------------------------|--------|
| Bond-lengths (Å)           |        | Bond-angles (degree) |        | Dihedral angles (degree) |                            | Bond-lengths (Å) |        | Bond-angles (degree) |        | Dihedral angles (degree) |        |
| <b>B1</b>                  | 1.4261 |                      |        |                          |                            | <b>B1</b>        | 1.4196 |                      |        |                          |        |
| <b>B2</b>                  | 1.4261 | <b>A1</b>            | 115.42 |                          |                            | <b>B2</b>        | 1.4228 | <b>A1</b>            | 115.38 |                          |        |
| <b>B3</b>                  | 1.4388 | <b>A2</b>            | 109.99 | <b>D1</b>                | 125.1                      | <b>B3</b>        | 1.4170 | <b>A2</b>            | 110.26 | <b>D1</b>                | 126.2  |
| <b>B4</b>                  | 1.3387 | <b>A3</b>            | 122.28 | <b>D2</b>                | 126.2                      | <b>B4</b>        | 1.3404 | <b>A3</b>            | 121.79 | <b>D2</b>                | 133.5  |
| <b>B5</b>                  | 1.5017 | <b>A4</b>            | 113.18 | <b>D3</b>                | -54.0                      | <b>B5</b>        | 1.4992 | <b>A4</b>            | 113.00 | <b>D3</b>                | -50.8  |
| <b>B6</b>                  | 1.3387 | <b>A5</b>            | 122.29 | <b>D4</b>                | -126.2                     | <b>B6</b>        | 1.3404 | <b>A5</b>            | 122.47 | <b>D4</b>                | -132.1 |
| <b>B7</b>                  | 1.5017 | <b>A6</b>            | 113.15 | <b>D5</b>                | 54.1                       | <b>B7</b>        | 1.5046 | <b>A6</b>            | 112.67 | <b>D5</b>                | 52.4   |
| <b>B8</b>                  | 1.4261 | <b>A7</b>            | 122.28 | <b>D6</b>                | 1.1                        | <b>B8</b>        | 1.4196 | <b>A7</b>            | 121.79 | <b>D6</b>                | -1.3   |
| <b>B9</b>                  | 1.5017 | <b>A8</b>            | 124.56 | <b>D7</b>                | 179.2                      | <b>B9</b>        | 1.5046 | <b>A8</b>            | 124.69 | <b>D7</b>                | 173.7  |
| <b>B10</b>                 | 1.5017 | <b>A9</b>            | 124.54 | <b>D8</b>                | -179.1                     | <b>B10</b>       | 1.4992 | <b>A9</b>            | 125.05 | <b>D8</b>                | -176.4 |
| <b>B11</b>                 | 1.0855 | <b>A10</b>           | 112.20 | <b>D9</b>                | -161.1                     | <b>B11</b>       | 1.0862 | <b>A10</b>           | 112.40 | <b>D9</b>                | -165.1 |
| <b>B12</b>                 | 1.0932 | <b>A11</b>           | 109.56 | <b>D10</b>               | -42.1                      | <b>B12</b>       | 1.0925 | <b>A11</b>           | 109.60 | <b>D10</b>               | -44.0  |
| <b>B13</b>                 | 1.0894 | <b>A12</b>           | 111.45 | <b>D11</b>               | 76.3                       | <b>B13</b>       | 1.0891 | <b>A12</b>           | 110.52 | <b>D11</b>               | 73.6   |
| <b>B14</b>                 | 1.0894 | <b>A13</b>           | 111.43 | <b>D12</b>               | -75.9                      | <b>B14</b>       | 1.0954 | <b>A13</b>           | 112.27 | <b>D12</b>               | -90.5  |
| <b>B15</b>                 | 1.0934 | <b>A14</b>           | 109.54 | <b>D13</b>               | 42.5                       | <b>B15</b>       | 1.0942 | <b>A14</b>           | 109.40 | <b>D13</b>               | 31.0   |
| <b>B16</b>                 | 1.0854 | <b>A15</b>           | 112.21 | <b>D14</b>               | 161.5                      | <b>B16</b>       | 1.0866 | <b>A15</b>           | 112.64 | <b>D14</b>               | 149.7  |
| <b>B17</b>                 | 1.4388 | <b>A16</b>           | 109.99 | <b>D15</b>               | -126.2                     | <b>B17</b>       | 1.4168 | <b>A16</b>           | 110.28 | <b>D15</b>               | 133.6  |
| <b>B18</b>                 | 1.0894 | <b>A17</b>           | 111.43 | <b>D16</b>               | -104.3                     | <b>B18</b>       | 1.0942 | <b>A17</b>           | 109.41 | <b>D16</b>               | -144.4 |
| <b>B19</b>                 | 1.0934 | <b>A18</b>           | 109.54 | <b>D17</b>               | 137.2                      | <b>B19</b>       | 1.0954 | <b>A18</b>           | 112.26 | <b>D17</b>               | 94.1   |
| <b>B20</b>                 | 1.0854 | <b>A19</b>           | 112.21 | <b>D18</b>               | 18.2                       | <b>B20</b>       | 1.0866 | <b>A19</b>           | 112.64 | <b>D18</b>               | -25.6  |
| <b>B21</b>                 | 1.0894 | <b>A20</b>           | 111.45 | <b>D19</b>               | 103.9                      | <b>B21</b>       | 1.0925 | <b>A20</b>           | 109.60 | <b>D19</b>               | 131.4  |
| <b>B22</b>                 | 1.0855 | <b>A21</b>           | 112.20 | <b>D20</b>               | -18.7                      | <b>B22</b>       | 1.0861 | <b>A21</b>           | 112.39 | <b>D20</b>               | 10.3   |
| <b>B23</b>                 | 1.0932 | <b>A22</b>           | 109.56 | <b>D21</b>               | -137.7                     | <b>B23</b>       | 1.0891 | <b>A22</b>           | 110.51 | <b>D21</b>               | -111.0 |
| <b>B24</b>                 | 1.7439 | <b>A23</b>           | 75.13  | <b>D22</b>               | 115.7                      | <b>B24</b>       | 1.7194 | <b>A23</b>           | 123.59 | <b>D22</b>               | -47.7  |
| <b>B25</b>                 | 1.7439 | <b>A24</b>           | 75.13  | <b>D23</b>               | -115.7                     | <b>B25</b>       | 1.7195 | <b>A24</b>           | 123.52 | <b>D23</b>               | -47.8  |

**Table SI-7:** Calculated structural parameters for the Doubly Reduced (DR) 2Li-TeMePzDO systems.
